# Supplementary material for: Facile Synthesis of Zn-Co-S Nanostrip Cluster Arrays on Ni Foam for High-Performance Hybrid Supercapacitors
Source: MDPI journal article supplement (doi:10.3390/nano11123209), 2021-11-26
Supplement: s1 [file s1]

# Supplementary Information

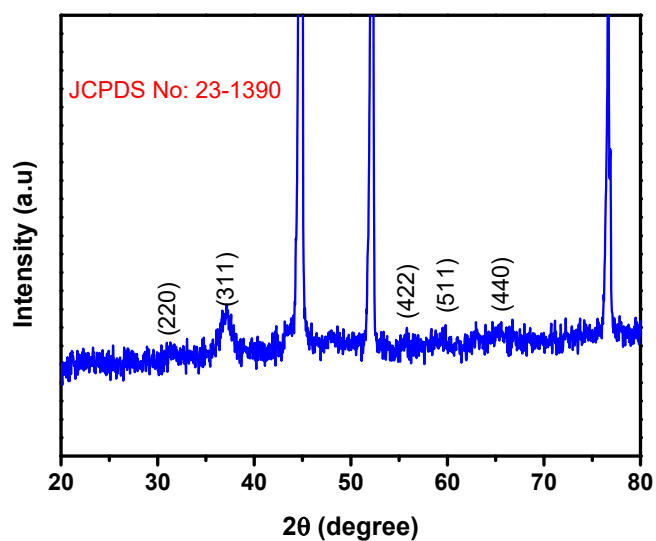

Figure S1. XRD pattern of the as-prepared  $\text{ZnCo}_2\text{O}_4$ .

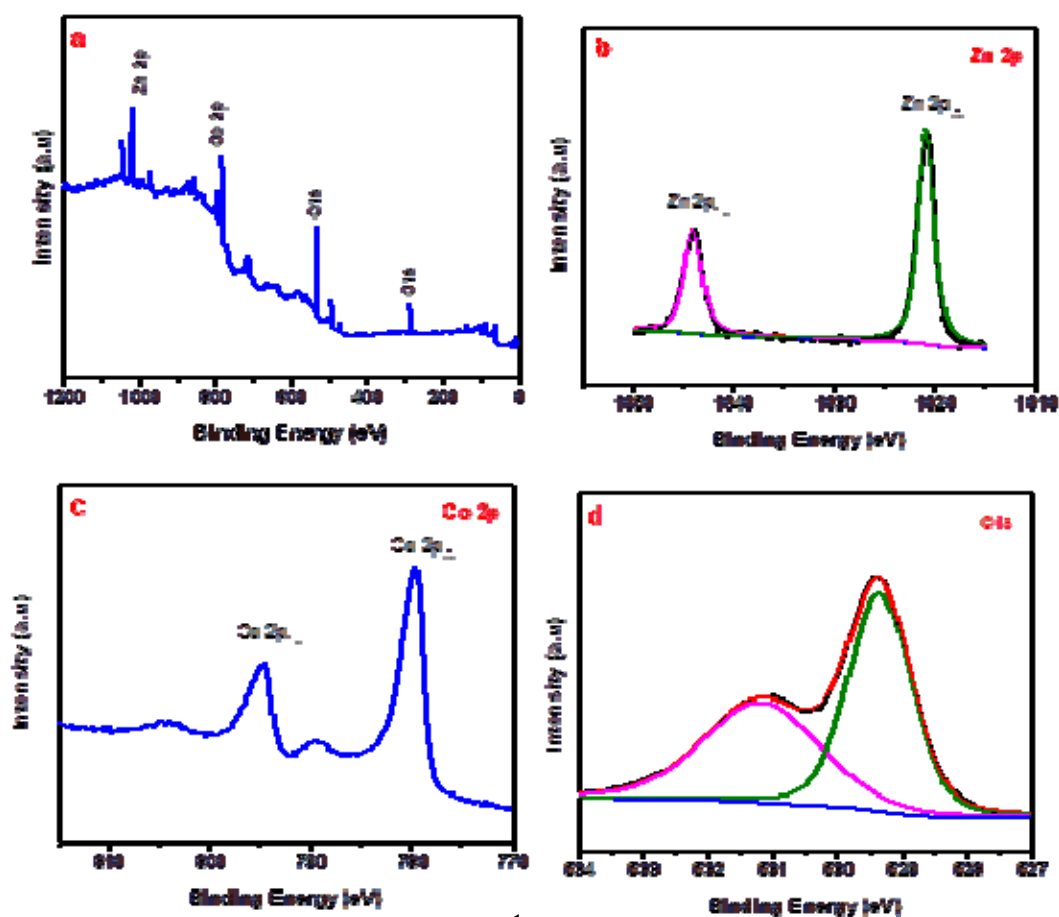

Figure S2. (a) XPS survey spectrum and (b) Zn 2p, (c) Co 2p, and (d) O 1S high-resolution spectra of  $\text{ZnCo}_2\text{O}_4$ .

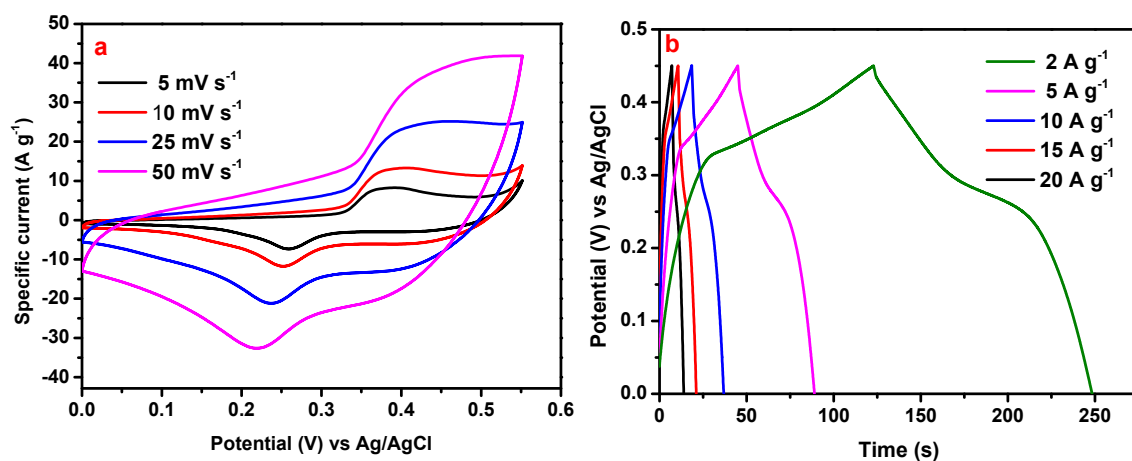

Figure S3. (a) CV curve at different scan rates and (b) the charge-discharge curves of the  $\text{ZnCo}_2\text{O}_4$  electrode.

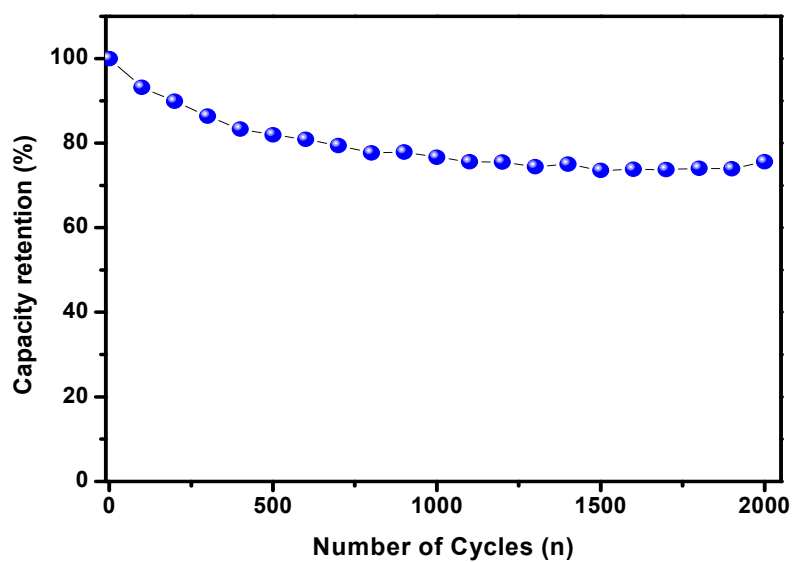

Figure S4. Cycling stability curve of the Zn-Co-S electrode measured at 20  $\text{A g}^{-1}$ .

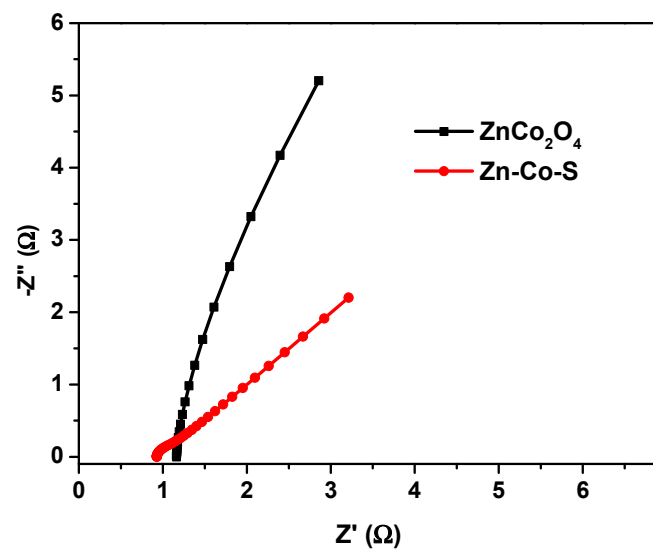

Figure S5. Impedance plots of the  $\text{ZnCo}_2\text{O}_4$  and  $\text{Zn-Co-S}$  electrodes.

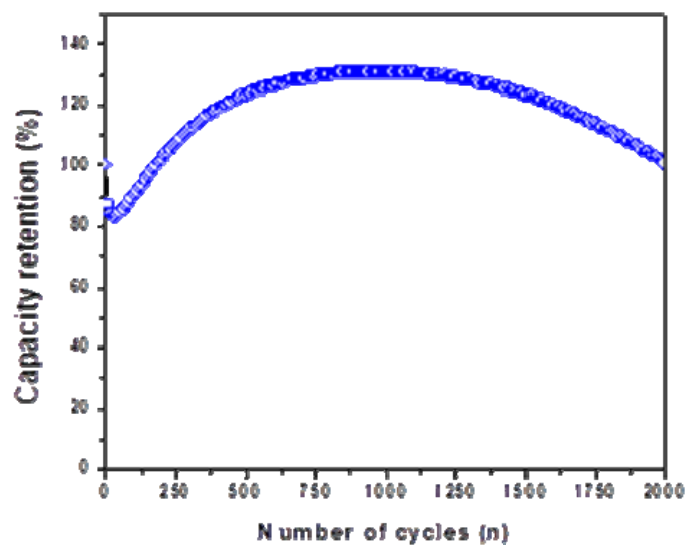

Figure S6. Cycling stability curve of the  $\text{Zn-Co-S}$ //AC asymmetric hybrid supercapacitor device.

## Performance comparison Tables

Table S1. Comparison of electrochemical performance of Zn-Co-S based supercapacitor

| Electrode material                      | C <sub>s</sub> [±]<br>(F g <sup>-1</sup> ) | ED<br>(Wh kg <sup>-1</sup> ) | PD<br>(W kg <sup>-1</sup> ) | Cycling stability | Ref.             |
|-----------------------------------------|--------------------------------------------|------------------------------|-----------------------------|-------------------|------------------|
| Zn <sub>x</sub> Co <sub>1-x</sub> S//AC | 486<br>(2 A g <sup>-1</sup> )              | 14.0                         | 450                         | NA                | [1]              |
| CoS <sub>x</sub> /C//PCNFs              | 497<br>(0.5 A g <sup>-1</sup> )            | 15.0                         | 413                         | 80%<br>(2000 cy)  | [2]              |
| ZnCoS//rGO                              | 1134<br>(1 A g <sup>-1</sup> )             | 17.7                         | 435                         | 84%<br>(5000 cy)  | [3]              |
| PPY/GO/ZnO//<br>PPY/GO/ZnO              | NA                                         | 10.6                         | 258                         | 74%<br>(1000 cy)  | [4]              |
| ZnO/GNR// LRGONR                        | 450<br>(5 mV s <sup>-1</sup> )             | 9.4                          | 1187                        | 97%<br>(5000 cy)  | [5]              |
| rGO/CoS <sub>2</sub> //AC               | 636<br>(1 A g <sup>-1</sup> )              | 13.8                         | 824                         | NA                | [6]              |
| Zn-Co-S//AC                             | 1840<br>(2 A g <sup>-1</sup> )             | 19.0                         | 514                         | 100%<br>(2000 cy) | <b>This work</b> |

C<sub>s</sub>[±]= Specific capacitance of a positive electrode

AC = activated carbon, PCNF = porous carbon nanofibers, cy = cycle

PPY = Polypyrrole, LRGONR = lacey reduced graphene oxide nanoribbons

## References

1. Yang, J.; Zhang, Y.; Sun, C.; Guo, G.; Sun, W.; Huang, W.; Yan, Q.; Dong, X. Controlled synthesis of zinc cobalt sulfide nanostructures in oil phase and their potential applications in electrochemical energy storage. *J. Mater. Chem. A* **2015**, *3*, 11462–11470, doi:10.1039/c5ta01739d.
2. Liu, Y.; Zhou, J.; Fu, W.; Zhang, P.; Pan, X.; Xie, E. In situ synthesis of CoS<sub>x</sub>@carbon core-shell nanospheres decorated in carbon nanofibers for capacitor electrodes with superior rate and cycling performances. *Carbon* **2017**, *114*, 187–197, doi:10.1016/j.carbon.2016.12.018.
3. Zhang, Y.; Cao, N.; Szunerits, S.; Addad, A.; Roussel, P.; Boukherroub, R. Fabrication of ZnCoS nanomaterial for high energy flexible asymmetric supercapacitors. *Chem. Eng. J.* **2019**, *374*, 347–358, doi:10.1016/j.CEJ.2019.05.181.
4. Chee, W.K.; Lim, H.N.; Harrison, I.; Chong, K.F.; Zainal, Z.; Ng, C.H.; Huang, N.M. Performance of Flexible and Binderless Polypyrrole/Graphene Oxide/Zinc Oxide Supercapacitor Electrode in a Symmetrical Two-Electrode Configuration. *Electrochim. Acta* **2015**, *157*, 88–94,

doi:10.1016/J.ELECTACTA.2015.01.080.

5. Sahu, V.; Goel, S.; Sharma, R.K.; Singh, G. Zinc oxide nanoring embedded lacey graphene nanoribbons in symmetric/asymmetric electrochemical capacitive energy storage. *Nanoscale* **2015**, *7*, 20642, doi:10.1039/c5nr06083d.
6. Chen, Q.; Cai, D.; Zhan, H. Construction of reduced graphene oxide nanofibers and cobalt sulfide nanocomposite for pseudocapacitors with enhanced performance. *J. Alloys Compd.* **2017**, *706*, 126–132, doi:10.1016/J.JALLCOM.2017.02.189.
